# Supplementary material for: Anti-tumor effect of estrogen-related receptor alpha knockdown on uterine endometrial cancer
Source: PubMed Central journal article supplement (PMC5085142; doi:10.18632/oncotarget.9151), 2016-05-03
Supplement: oncotarget-07-34131-s001.pdf [file oncotarget-07-34131-s001.pdf]

# Anti-tumor effect of estrogen-related receptor alpha knockdown on uterine endometrial cancer

## Supplementary Material

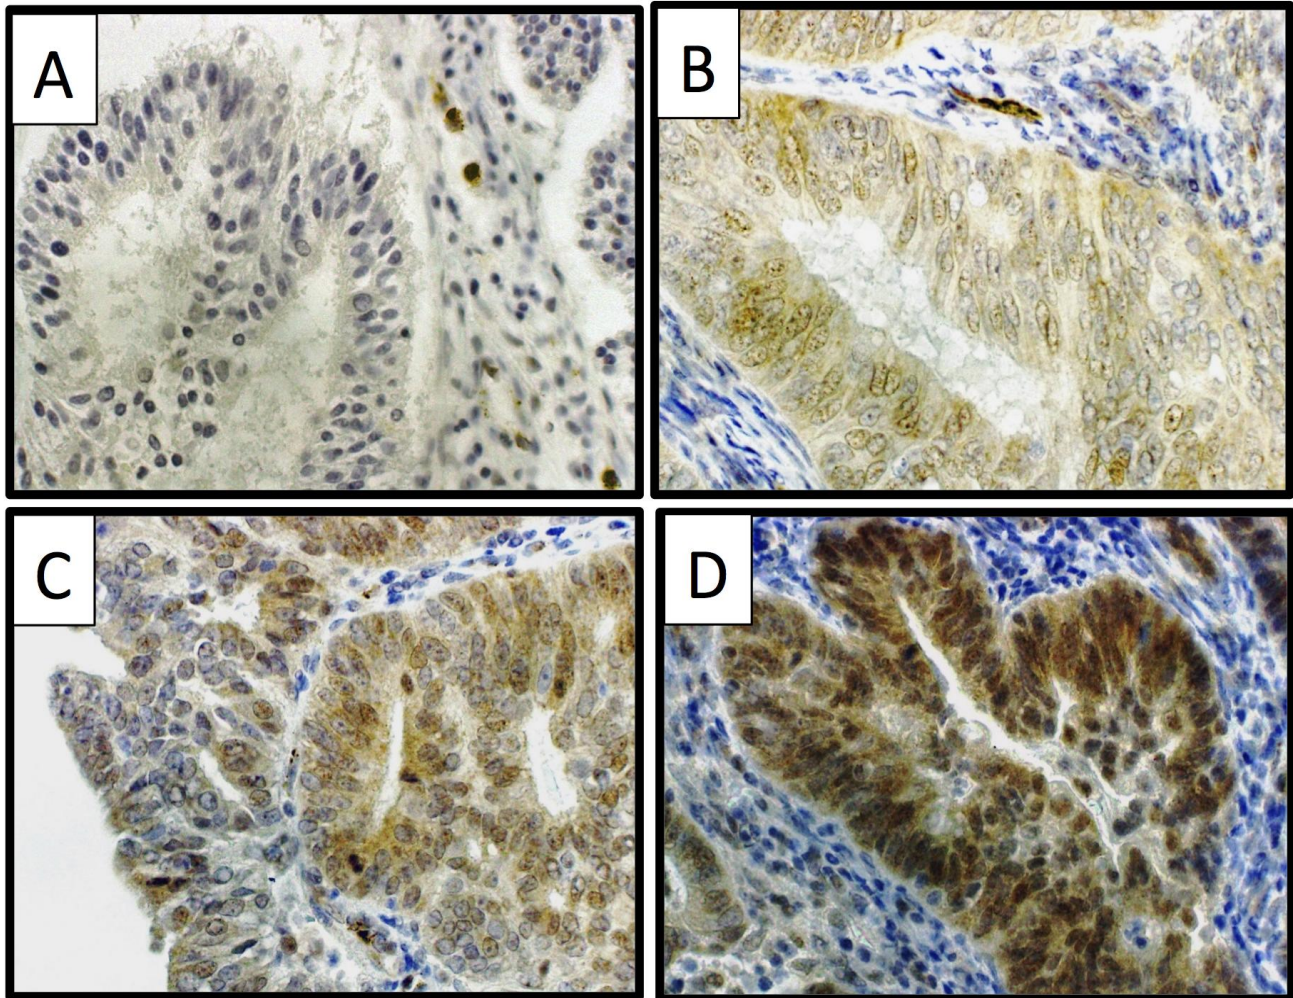

### Supplementary Figure S1

The intensity of the immunohistochemical staining for  $ERR\alpha$  was scored as 0 (no staining) (A), 1 (weak staining) (B), 2 (moderate staining) (C), and 3 (strong staining) (D).
